# Supplementary material for: Mapping species of greatest conservation need and solar energy potential in the arid Southwest for future sustainable development
Source: PeerJ journal article supplement (doi:10.7717/peerj.18568), 2025-01-02
Supplement: FigureS3.pdf [file FigureS3.pdf]

# SED Opportunities When Considering Biological Impact

Description -  
Includes all target species IUCN extants,  
also including both resident and breeding  
extants for *Toxostoma Bendirei* and  
*Athene Cunicularia*.

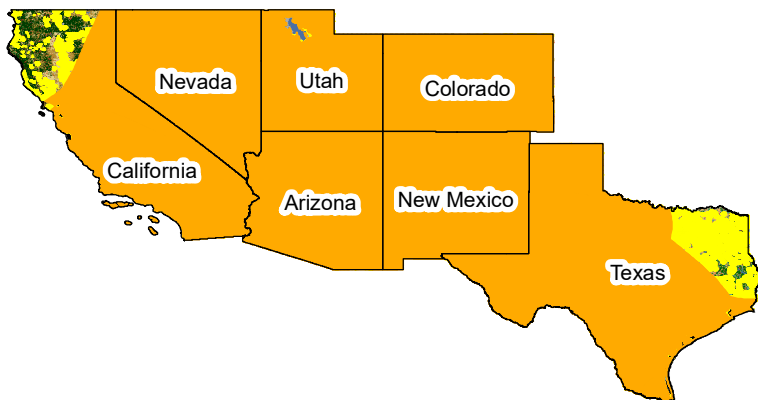

Description -  
Includes all target species resident IUCN  
extants, excludng breeding extants for  
*Toxostoma Bendirei* and *Athene  
Cunicularia*.

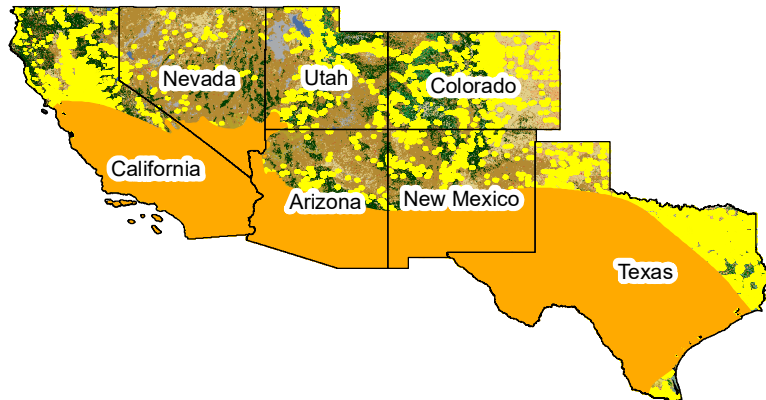

Description -  
Includes *Toxostoma Locontei*, *Gopherus  
Morafkai*, *Gopherus Agassizii* IUCN extants,  
and resident exant for *Toxostoma Bendirei*.

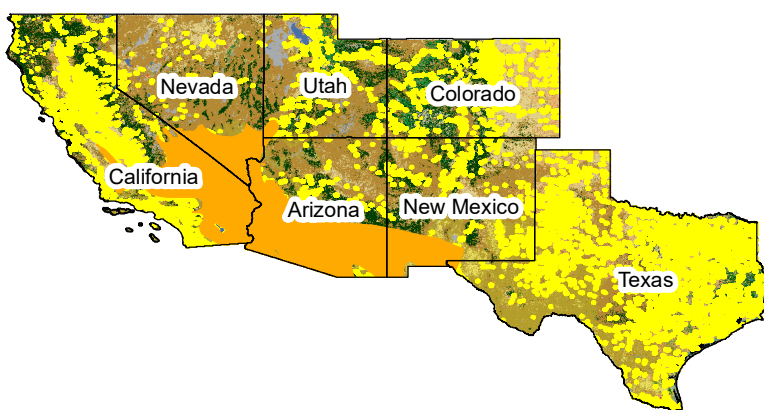

Description -  
Includes all nonmigratory IUCN extants,  
including *Toxostoma Lecontei*, *Gopherus  
Agassizii*, and *Gopherus Morafkai*.

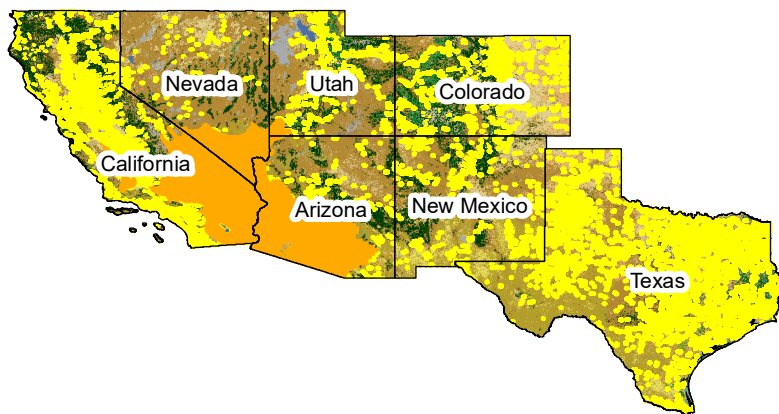

## Legend

Target Species High Priority Habitat

Suitable SED Locations

0 250 500 1,000 Miles

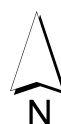

Author: Kylee Fleckenstein
