# Supplementary material for: Mapping species of greatest conservation need and solar energy potential in the arid Southwest for future sustainable development
Source: PeerJ journal article supplement (doi:10.7717/peerj.18568), 2025-01-02

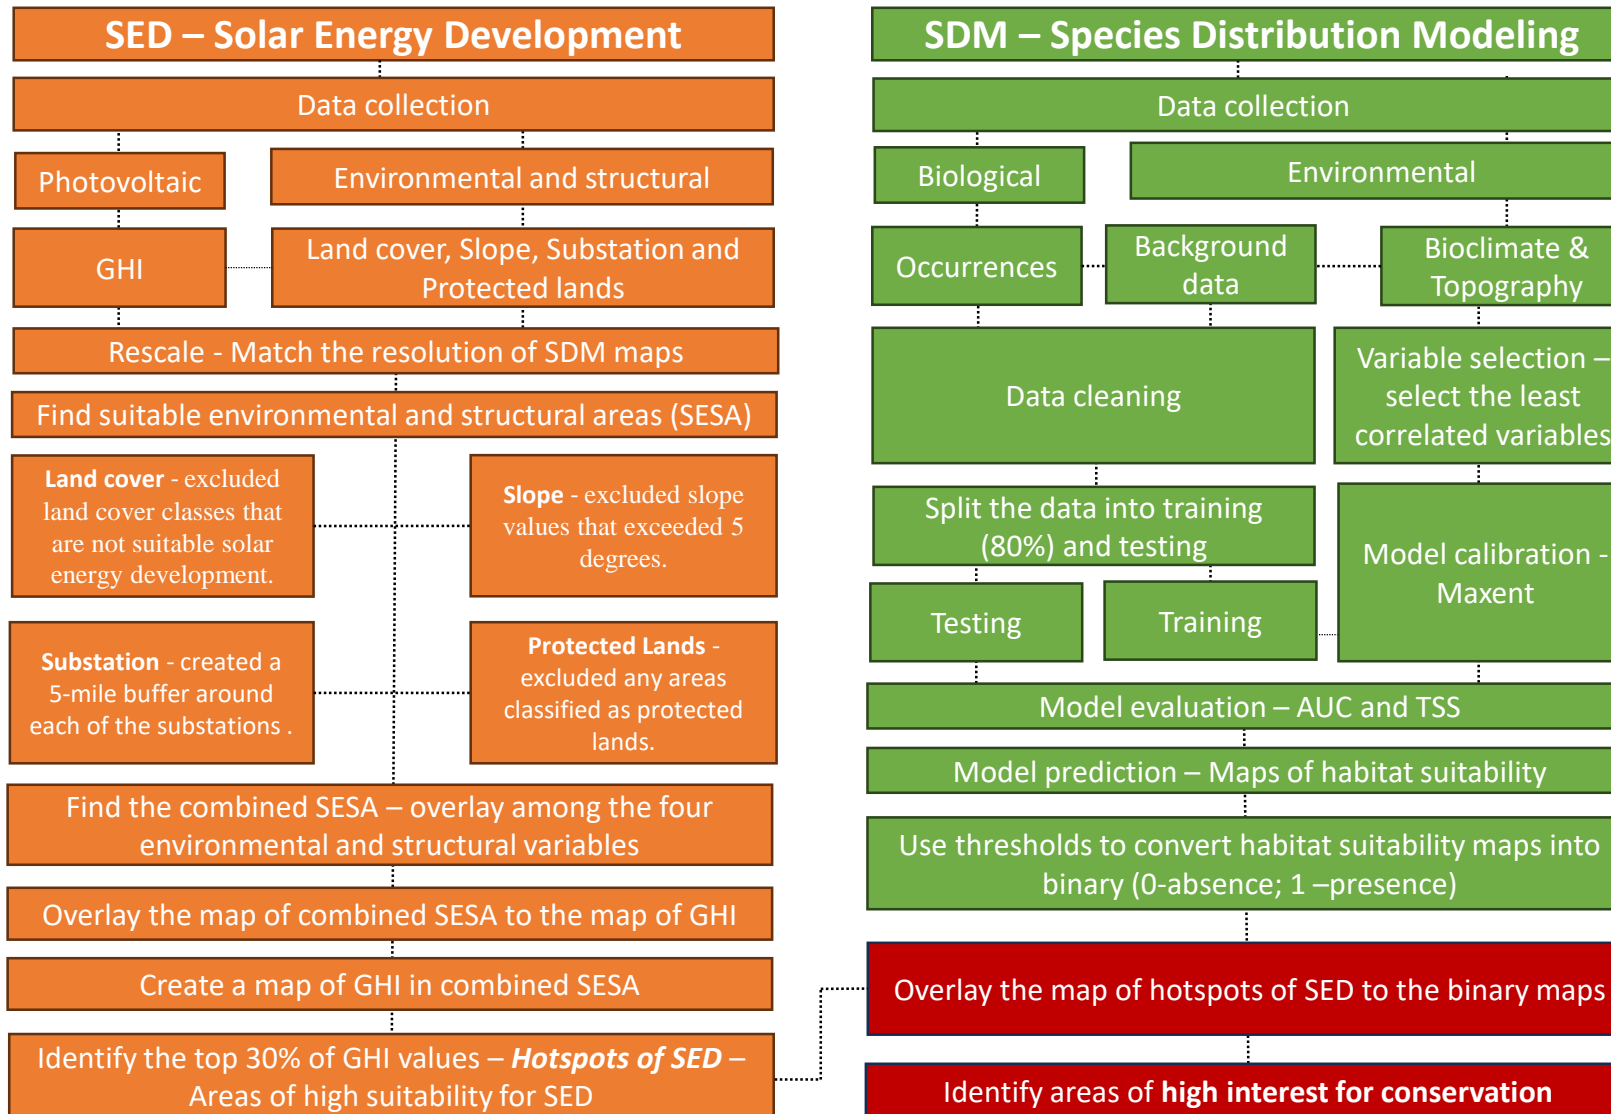

Supplement: FigureS5.pdf [file FigureS5.pdf]
